# Supplementary material
Source: publisher figshare collection journal article supplement (https://asha.figshare.com/articles/dataset/_/5923318)
Supplement: Supplementary file 1 [file 1]

**Supplemental Material S3.** Benchmarks for magnitude of standard mean difference using pooled variance ( $SMD_p$ ) using quartiles obtained from participant results for each sentence type treated.

| Quartile                    | Magnitude of effect | AC   | OC   | RC   |
|-----------------------------|---------------------|------|------|------|
| 25 <sup>th</sup> percentile | Small               | 0.40 | > 0* | .69  |
| 50 <sup>th</sup> percentile | Medium              | 0.94 | 0.15 | 1.13 |
| 75 <sup>th</sup> percentile | Large               | 1.51 | 0.55 | 1.59 |

\*25<sup>th</sup> percentile value fell below zero; benchmark set at greater than zero for this sentence type.

*Note.*  $SMD_p$  = standard mean difference using pooled variance; AC = adverbial clauses; OC = object complements; RC = relative clauses.
