# Supplementary material
Source: publisher figshare collection journal article supplement (https://asha.figshare.com/articles/dataset/_/5923318)
Supplement: Supplementary file 2 [file 1]

**Supplemental Material S4.** Correlation ( $r^2$  values) of pretest variables with effect sizes (for each sentence type) and select language test gain scores.

| Pretest | <u>Effect size</u> |         |       | <u>Test gain score</u> |       |       |        |
|---------|--------------------|---------|-------|------------------------|-------|-------|--------|
|         | AC                 | OC      | RC    | CELF-4                 | CFD   | RS    | FS     |
| Age     | .021               | .035    | -.141 | -.206                  | -.096 | -.316 | .046   |
| TONI    | -.071              | -.047   | -.028 | .127                   | .229  | .022  | .050   |
| CELF4   | .105               | -.165   | -.029 | -.165                  | .367  | -.199 | -.159  |
| CFD     | .270               | -.258   | -.177 | -.103                  | .038  | -.178 | -.033  |
| RS      | .110               | -.185   | .083  | .240                   | .182  | -.070 | .278   |
| FS      | -.124              | -.400*  | -.072 | -.185                  | .375  | -.028 | -.394* |
| AC Pre  | -.628**            | .385    | -.147 | .003                   | .060  | .227  | -.078  |
| OC Pre  | -.078              | -.569** | -.139 | .096                   | .337  | -.182 | .208   |
| RC Pre  | -.363              | -.563** | -.310 | .100                   | .375  | .211  | -.056  |

*Note.* Effect size refers to the value of standard mean difference using pooled variance ( $SMD_p$ ). Gain refers to the difference between pre and posttest standard scores. CELF-4 = Clinical Evaluation of Language Fundamentals–Fourth Edition, Core Language Quotient (Semel, Wiig, & Secord, 2003); CFD = Concepts and Following Directions subtest; RS = Recalling Sentences subtest; FS = Formulated Sentences subtest; TONI = standard score on Test of Nonverbal Intelligence–Third or Fourth Edition (Brown, Sherbenou, & Johnsen, 1997, 2010); AC = adverbial clauses; OC = object complements; RC = relative clauses.

\*  $p < .03$ . \*\*  $p < .01$ .

## References

- Brown, L., Sherbenou, R. J., & Johnsen, S. K. (1997). *Test of Nonverbal Intelligence–Third Edition*. Austin, TX: Pro-Ed.
- Brown, L., Sherbenou, R. J., & Johnsen, S. K. (2010). *Test of Nonverbal Intelligence–Fourth Edition*. Austin, TX: Pro-Ed.
- Semel, E., Wiig, E., & Secord, W. (2003). *Clinical Evaluation of Language Fundamentals–Fourth Edition*. San Antonio, TX: Harcourt.
