# Supplementary material
Source: publisher figshare collection journal article supplement (https://asha.figshare.com/articles/dataset/_/5923318)
Supplement: Supplementary file 3 [file 1]

**Supplemental Material S1.** Examples of experimental probe items (with a correct response in italics).

Adverbial Clauses, Right-Branching

The astronauts on Apollo 13 could not land on the moon. The spaceship malfunctioned.

- The astronauts on Apollo 13 could not land on the moon *because the spaceship malfunctioned*.

Adverbial Clauses, Left-Branching

The theater offers some discounts. Movies cost a lot of money.

- *Even though the theatre offers some discounts*, movies cost a lot of money.

Object Complement Clauses, Nonfinite

The teacher put a tough math problem on the board. Jake thought he could solve it.

- Jake volunteered *to solve the tough math problem*.

Object Complement Clauses, Finite

Scientists announced an exciting new finding. The King Tut mummy has been located.

- Scientists claim *that the King Tut mummy has been located*.

Relative Clauses, Subject-Subject

The student was expelled for one week. The student started a fight in the hallway.

- The student *who started a fight in the hallway* was expelled for one week.

Subject-Object

The man spent the night in jail. The policeman arrested the man for disorderly conduct.

- The man *who the policeman arrested for disorderly conduct* spent the night in jail.

Relative Clauses, Object-Subject

The planet Saturn is surrounded by rings. The rings are made of various gases.

- The planet Saturn is surrounded by rings *that are made of various gases*.

Relative Clauses, Object-Object

- President Obama signed the health care legislation. Congress passed the health care legislation.
- President Obama signed the health care legislation *that Congress passed*.
