# Supplementary material
Source: publisher figshare collection journal article supplement (https://asha.figshare.com/articles/dataset/_/5923318)
Supplement: Supplementary file 4 [file 1]

## Supplemental Material S2. Complex sentence probe scoring rubric.

This rubric codes the ability of the student to do targeted subordination operations. The student can earn a score of 0 (lowest) to 3 (highest).

| Points | Definition                                                                                                                                                                                                                                                                                                                                                                                                                                                                                                                                                                                                                                                                                                                                                                                                                                                                                                                                                                                                                                                                                                                                                                                                                                                                                                                                                                                                                                                                           |
|--------|--------------------------------------------------------------------------------------------------------------------------------------------------------------------------------------------------------------------------------------------------------------------------------------------------------------------------------------------------------------------------------------------------------------------------------------------------------------------------------------------------------------------------------------------------------------------------------------------------------------------------------------------------------------------------------------------------------------------------------------------------------------------------------------------------------------------------------------------------------------------------------------------------------------------------------------------------------------------------------------------------------------------------------------------------------------------------------------------------------------------------------------------------------------------------------------------------------------------------------------------------------------------------------------------------------------------------------------------------------------------------------------------------------------------------------------------------------------------------------------|
| 3      | <p>Forms a complete (complex) sentence containing the target subordinate clause (the targeted general type: AC, RC, or OC) that is grammatically and semantically correct. Accepted variations include:</p> <ul style="list-style-type: none"> <li>• AC: If a subordinate conjunction other than those listed on answer sheet is used and makes sense semantically</li> <li>• AC: Reverses main vs. subordinate clause relationship of target but is semantically acceptable</li> <li>• OC and RC: If optional <i>that</i> is omitted</li> <li>• OC: If another subtype besides target is used but is semantically acceptable (e.g., <i>wh</i>-interrogative is targeted, but <i>that</i> is used and makes sense)</li> <li>• RC: If reduced relative is used (optional relative pronoun and auxiliary verb and/or copula BE is missing)</li> <li>• AC, OC, RC: Nonobligatory information in stimulus clauses may be omitted (e.g., nonobligatory adverbs)</li> </ul>                                                                                                                                                                                                                                                                                                                                                                                                                                                                                                                |
| 2      | <p>AC, OC, RC: Forms a complete (complex) sentence containing a non-target subordinate clause that is acceptable grammatically and semantically</p> <p>AC, OC, RC: Forms a complete (complex) sentence (target or non-target) and there is some issue that causes a semantic problem or a grammatical problem that results from the operation of combining the target stimulus sentences</p> <ul style="list-style-type: none"> <li>• AC: Uses a subordinate conjunction other than the targeted one and this results in a semantic problem</li> <li>• The target subordinate clause is turned into the main clause and the target main clause into the subordinate clause and, as a result, there is a semantic problem (if main and subordinate clauses are switched in AC or RC targets and there is no semantic issue resulting, this would get a 3 [see above])</li> <li>• AC, OC, RC: Verb tense/agreement issue believed to be caused by combining clauses</li> <li>• Uses three clauses to get the information across instead of two or adds in redundant information (note that, in OC items, a third clause may maintain information provided in the stimulus sentences, and this is not penalized and receives a 3)</li> <li>• Redundant noun/relative pronoun (fails to omit the noun that is relativized)</li> <li>• A response that is a complete simple (one-clause) sentence that manages to get across the general meaning of the two stimulus sentences</li> </ul> |
| 1      | <p>AC, OC, RC: Forms a complete sentence by combining target clauses (verbatim or almost verbatim) with a conjunction (coordinate or subordinate)</p> <p>AC, OC, RC: Uses a subordinate conjunction for numerous probe items (e.g., including OC and RC in addition to AC)</p> <p>AC, OC, RC: There are numerous grammatical or semantic problems</p>                                                                                                                                                                                                                                                                                                                                                                                                                                                                                                                                                                                                                                                                                                                                                                                                                                                                                                                                                                                                                                                                                                                                |
| 0      | <p>Does not form a complete sentence (defined by having a proper subject/verb combination in any clause or clauses)</p> <p>Repeats one or both stimulus sentences verbatim or with minor changes</p>                                                                                                                                                                                                                                                                                                                                                                                                                                                                                                                                                                                                                                                                                                                                                                                                                                                                                                                                                                                                                                                                                                                                                                                                                                                                                 |

*Note.* AC = adverbial clause; RC = relative clause; OC = object complement.
